# Supplementary material
Source: ML conference proceedings conference paper supplement (https://proceedings.mlr.press/v32/suzumura14.html)
Supplement: Supplementary file 1 [file suzumura14-supp.pdf]

### A. Proof of Theorem 3

Although  $f_{\mathcal{P}}^*$  is a feasible solution, it is not a local optimum for  $\theta \in [0, 1]$  and  $s \leq 0$  because

$$\alpha_i \leq C\theta \quad \text{for } i \in \tilde{\mathcal{I}} \cap \mathcal{O}, \quad (12a)$$

$$\alpha_i \geq C \quad \text{for } i \in \tilde{\mathcal{O}} \cap \mathcal{I}, \quad (12b)$$

violate the KKT conditions (7) for  $\tilde{\mathcal{P}}$ . These feasibility and sub-optimality indicates that

$$J_{\tilde{\mathcal{P}}}(f_{\tilde{\mathcal{P}}}^*; \theta) < J_{\mathcal{P}}(f_{\mathcal{P}}^*; \theta), \quad (13)$$

we arrive at (9).

**Q.E.D.**

### B. Proof of Theorem 4

**Sufficiency:** If (10e) is true, i.e., if there are NO instances with  $y_i f_{\mathcal{P}}^*(\mathbf{x}_i) = s$ , then any convex problems defined by different partitions  $\tilde{\mathcal{P}} \neq \mathcal{P}$  do not have feasible solutions in the neighborhood of  $f_{\mathcal{P}}^*$ . This means that if  $f_{\mathcal{P}}^*$  is a conditionally optimal solution, then it is locally optimal. (10a)-(10d) are sufficient for  $f_{\mathcal{P}}^*$  to be conditionally optimal for the given partition  $\mathcal{P}$ . Thus, (10) is sufficient for  $f_{\mathcal{P}}^*$  to be locally optimal.

**Necessity:** From Theorem 3, if there exists an instance such that  $y_i f_{\mathcal{P}}^*(\mathbf{x}_i) = s$ , then  $f_{\mathcal{P}}^*$  is a feasible but not locally optimal. Then (10e) is necessary for  $f_{\mathcal{P}}^*$  to be locally optimal. In addition, (10a)-(10d) are also necessary for local optimality, because of every local optimal solutions are conditionally optimal for the given partition  $\mathcal{P}$ . Thus, (10) is necessary for  $f_{\mathcal{P}}^*$  to be locally optimal.

**Q.E.D.**

### C. Implementation of D-step

In D-step, we work with the following convex problem

$$f_{\tilde{\mathcal{P}}}^* := \operatorname{argmin}_{f \in \operatorname{pol}(\mathcal{P}; s)} J_{\tilde{\mathcal{P}}}(f; \theta). \quad (14)$$

where,  $\tilde{\mathcal{P}}$  is updated from  $\mathcal{P}$  as (8).

Let us define a partition  $\Pi := \{\mathcal{R}, \mathcal{E}, \mathcal{L}, \tilde{\mathcal{I}}', \tilde{\mathcal{O}}', \hat{\mathcal{O}}''\}$  of  $\mathbb{N}_n$  such that

$$i \in \mathcal{R} \Rightarrow y_i f(\mathbf{x}_i) > 1, \quad (15a)$$

$$i \in \mathcal{E} \Rightarrow y_i f(\mathbf{x}_i) = 1, \quad (15b)$$

$$i \in \mathcal{L} \Rightarrow s < y_i f(\mathbf{x}_i) < 1, \quad (15c)$$

$$i \in \tilde{\mathcal{I}}' \Rightarrow y_i f(\mathbf{x}_i) = s \text{ and } i \in \tilde{\mathcal{I}}, \quad (15d)$$

$$i \in \tilde{\mathcal{O}}' \Rightarrow y_i f(\mathbf{x}_i) = s \text{ and } i \in \tilde{\mathcal{O}}, \quad (15e)$$

$$i \in \hat{\mathcal{O}}'' \Rightarrow y_i f(\mathbf{x}_i) < s. \quad (15f)$$

If we write the conditionally optimal solution as

$$f_{\tilde{\mathcal{P}}}^*(x) := \sum_{j \in \mathbb{N}_n} \alpha_j^* y_j K(x, \mathbf{x}_j), \quad (16)$$

$\{\alpha_j^*\}_{j \in \mathbb{N}_n}$  must satisfy the following KKT conditions

$$y_i f_{\tilde{\mathcal{P}}}^*(\mathbf{x}_i) > 1 \Rightarrow \alpha_i^* = 0 \quad (17a)$$

$$y_i f_{\tilde{\mathcal{P}}}^*(\mathbf{x}_i) = 1 \Rightarrow \alpha_i^* \in [0, C], \quad (17b)$$

$$s < y_i f_{\tilde{\mathcal{P}}}^*(\mathbf{x}_i) < 1 \Rightarrow \alpha_i^* = C \quad (17c)$$

$$y_i f_{\tilde{\mathcal{P}}}^*(\mathbf{x}_i) = s, i \in \tilde{\mathcal{I}}' \Rightarrow \alpha_i^* \geq C, \quad (17d)$$

$$y_i f_{\tilde{\mathcal{P}}}^*(\mathbf{x}_i) = s, i \in \tilde{\mathcal{O}}' \Rightarrow \alpha_i^* \leq C\theta, \quad (17e)$$

$$y_i f_{\tilde{\mathcal{P}}}^*(\mathbf{x}_i) < s, i \in \hat{\mathcal{O}}'' \Rightarrow \alpha_i^* = C\theta. \quad (17f)$$

At the beginning of the D-step,  $f_{\tilde{\mathcal{P}}}^*(\mathbf{x}_i)$  violates the KKT conditions by

$$\Delta f_i := y_i \begin{bmatrix} \mathbf{K}_{i, \Delta_{\mathcal{I} \rightarrow \mathcal{O}}} & \mathbf{K}_{i, \Delta_{\mathcal{O} \rightarrow \mathcal{I}}} \end{bmatrix} \begin{bmatrix} \alpha_{\Delta_{\mathcal{I} \rightarrow \mathcal{O}}}^{(\text{bef})} - \mathbf{1}C\theta \\ \alpha_{\Delta_{\mathcal{O} \rightarrow \mathcal{I}}}^{(\text{bef})} - \mathbf{1}C \end{bmatrix}.$$

where  $\alpha^{(\text{bef})}$  is the corresponding  $\alpha$  at the beginning of the D-step, while  $\Delta_{\mathcal{I} \rightarrow \mathcal{O}}$  and  $\Delta_{\mathcal{O} \rightarrow \mathcal{I}}$  denote the difference in  $\tilde{\mathcal{P}}$  and  $\mathcal{P}$  defined as

$$\Delta_{\mathcal{I} \rightarrow \mathcal{O}} := \{i \in \mathcal{I} \mid y_i f_{\mathcal{P}}(\mathbf{x}_i) = s\},$$

$$\Delta_{\mathcal{O} \rightarrow \mathcal{I}} := \{i \in \mathcal{O} \mid y_i f_{\mathcal{P}}(\mathbf{x}_i) = s\}.$$

Then, we consider the following another parametrized problem with a parameter  $\mu \in [0, 1]$ :

$$f_{\tilde{\mathcal{P}}}(\mathbf{x}_i; \mu) := f_{\tilde{\mathcal{P}}}(\mathbf{x}_i) + \mu \Delta f_i \quad \forall i \in \mathbb{N}_n.$$

In order to always satisfy the KKT conditions for  $f_{\tilde{\mathcal{P}}}(\mathbf{x}_i; \mu)$ , we solve the following linear system

$$\mathbf{Q}_{\mathcal{A}, \mathcal{A}} \begin{bmatrix} \alpha_{\mathcal{E}} \\ \alpha_{\tilde{\mathcal{I}}'} \\ \alpha_{\tilde{\mathcal{O}}'} \end{bmatrix} = \begin{bmatrix} \mathbf{1} \\ s \\ s \end{bmatrix} - \mathbf{Q}_{\mathcal{A}, \mathcal{L}} \mathbf{1}C - \mathbf{Q}_{\mathcal{A}, \hat{\mathcal{O}}''} \mathbf{1}C\theta \\ - \begin{bmatrix} \mathbf{Q}_{\mathcal{A}, \Delta_{\mathcal{I} \rightarrow \mathcal{O}}} & \mathbf{Q}_{\mathcal{A}, \Delta_{\mathcal{O} \rightarrow \mathcal{I}}} \end{bmatrix} \begin{bmatrix} \alpha_{\Delta_{\mathcal{I} \rightarrow \mathcal{O}}}^{(\text{bef})} - \mathbf{1}C\theta \\ \alpha_{\Delta_{\mathcal{O} \rightarrow \mathcal{I}}}^{(\text{bef})} - \mathbf{1}C \end{bmatrix} \mu,$$

where  $\mathcal{A} := \{\mathcal{E}, \tilde{\mathcal{I}}', \tilde{\mathcal{O}}'\}$ . This linear system can also be solved by using the piecewise-linear parametric programming while the scalar parameter  $\mu$  is continuously moved from 1 to 0.

In this parametric problem, we can show that  $f_{\tilde{\mathcal{P}}}^*(\mathbf{x}_i; \mu) = f_{\tilde{\mathcal{P}}}^*(\mathbf{x}_i)$  if  $\mu = 1$  and  $f_{\tilde{\mathcal{P}}}^*(\mathbf{x}_i; \mu) = f_{\mathcal{P}}^*(\mathbf{x}_i)$  if  $\mu = 0$  for all  $i \in \mathbb{N}_n$ .

Since the number of elements in  $\Delta_{\mathcal{I} \rightarrow \mathcal{O}}$  and  $\Delta_{\mathcal{O} \rightarrow \mathcal{I}}$  are typically small, the D-step can be efficiently implemented by a technique used in the context of incremental learning (Cauwenberghs & Poggio, 2001).
